# Supplementary material for: Tunable magnetic and electronic properties of CrS2/VS2 lateral superlattices
Source: Royal Society of Chemistry journal article supplement (doi:10.1039/d4nr03857f), 2024-12-02
Supplement: d4nr03857f1.pdf [file d4nr03857f1.pdf]

## Supplementary Materials for “Tunable Magnetic and Electronic Properties of CrS<sub>2</sub>/VS<sub>2</sub> Lateral Superlattices”

Huimin Gao,<sup>1</sup> Yimei Fang,<sup>2</sup> Yinghui Zhou,<sup>1,\*</sup> Feng Zheng,<sup>2</sup> Tie-Yu Lü,<sup>1</sup> Xinrui Cao,<sup>1,3</sup> Zi-zhong Zhu,<sup>1,3</sup> and Shunqing Wu<sup>1,\*</sup>

<sup>1</sup>*Department of Physics, OSED, Key Laboratory of Low Dimensional Condensed Matter Physics (Department of Education of Fujian Province), Xiamen University, Xiamen 361005, China*

<sup>2</sup>*School of Science, Jimei University, Xiamen 361021, China*

<sup>3</sup>*Fujian Provincial Key Laboratory of Theoretical and Computational Chemistry, Xiamen University, Xiamen 361005, China*

### Content

Figure S1. The energy differences between the ferromagnetic and antiferromagnetic states of monolayers (a) 1T-CrS<sub>2</sub> and (b) 2H-VS<sub>2</sub> for different effective U values.

Figure S2. Band structures and density of states of monolayer CrS<sub>2</sub> and VS<sub>2</sub>.

Figure S3. The formation energy of the lateral superlattice CrS<sub>2</sub>(*m*)/VS<sub>2</sub>(*n*) (*m*+*n*=14) as a function of the width (*m*) of the CrS<sub>2</sub> sublattice.

Figure S4. The energy profiles of various magnetic configurations evolve as a function of the number of units for *m*+*n*=13.

Figure S5. Top view of monolayers (a) 1T-CrS<sub>2</sub> and (b) 2H-VS<sub>2</sub>. The orange and green arrows correspond to lattice constants *a* and *b*. The red arcs represent the Cr-S-Cr (V-S-V) angles  $\theta_1$  and  $\theta_2$ , respectively.

Figure S6. Schematic diagrams illustrating three magnetic orders used for the calculation of exchange parameters: (a) FM, (b) FM&AFM, (c) AFM1 and (d) AFM2.

Figure S7. Projected density of states of the central unit cells of CrS<sub>2</sub> and VS<sub>2</sub> in the CrS<sub>2</sub>(7)/VS<sub>2</sub>(7) superlattice.

Figure S8. The charge transfer at the interface from the CrS<sub>2</sub> ribbon to the VS<sub>2</sub> ribbon as a function of the number of units for *m*=*n*.

Figure S9. Projected density of states of the central unit cells of CrS<sub>2</sub> and VS<sub>2</sub> in the CrS<sub>2</sub>(1)/VS<sub>2</sub>(13) and CrS<sub>2</sub>(13)/VS<sub>2</sub>(1) superlattices.

---

\* Email: [wsgq@xmu.edu.cn](mailto:wsgq@xmu.edu.cn) (S.Q.W.); [yhzhou@xmu.edu.cn](mailto:yhzhou@xmu.edu.cn) (Y.H.Z.)

Table S1. Structural parameters of the FM and sAFM states for monolayers 1T-CrS<sub>2</sub> and 2H-VS<sub>2</sub>.

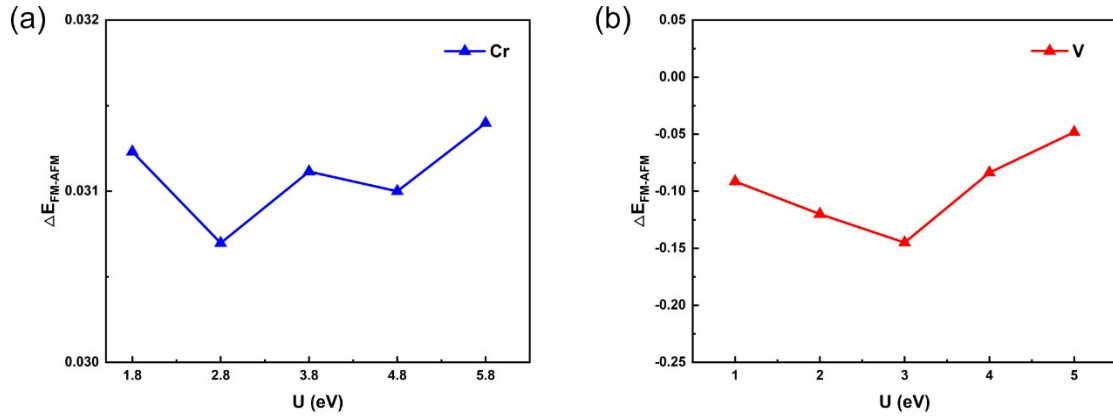

**Figure S1.** The energy differences between the ferromagnetic and antiferromagnetic states of monolayers (a) 1T-CrS<sub>2</sub> and (b) 2H-VS<sub>2</sub> for different effective  $U$  values.

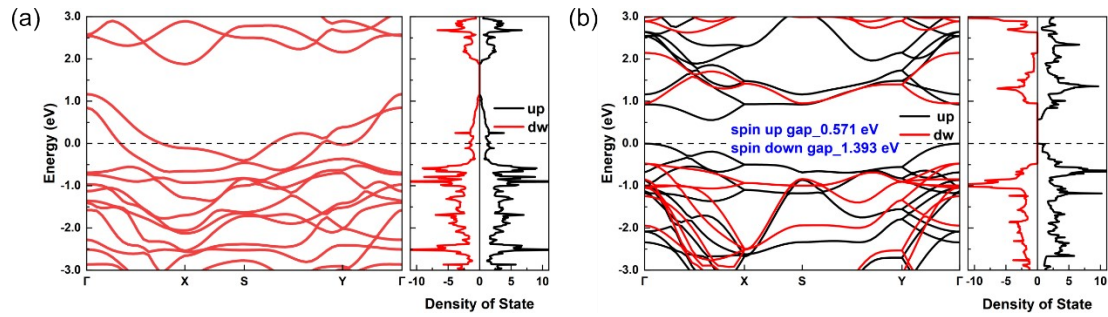

**Figure S2.** Band structures and density of states of monolayer (a) CrS<sub>2</sub> and (b) VS<sub>2</sub>.

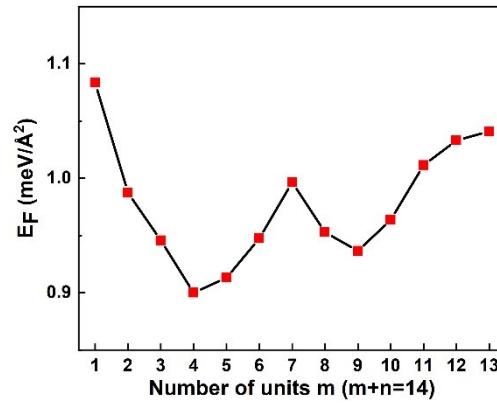

**Figure S3.** The formation energy of the lateral superlattice  $\text{CrS}_2(m)/\text{VS}_2(n)$  ( $m+n=14$ ) as a function of the width ( $m$ ) of the  $\text{CrS}_2$  sublattice.

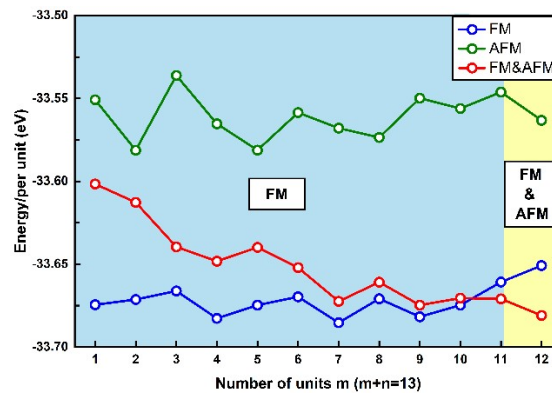

**Figure S4.** The energy profiles of various magnetic configurations evolve as a function of the number of units for  $m+n=13$ .

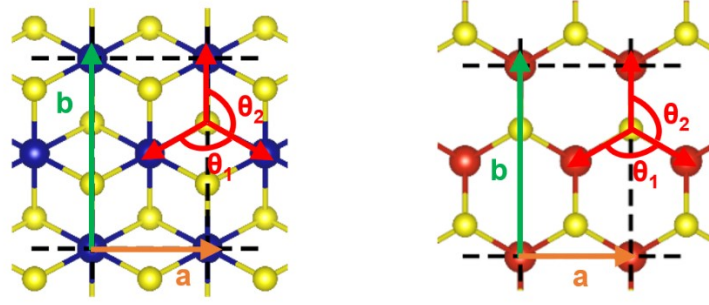

**Figure S5.** Top view of monolayers (a) 1T-CrS<sub>2</sub> and (b) 2H-VS<sub>2</sub>. The orange and green arrows correspond to lattice constants  $a$  and  $b$ . The red arcs represent the Cr-S-Cr (V-S-V) angles  $\theta_1$  and  $\theta_2$ , respectively.

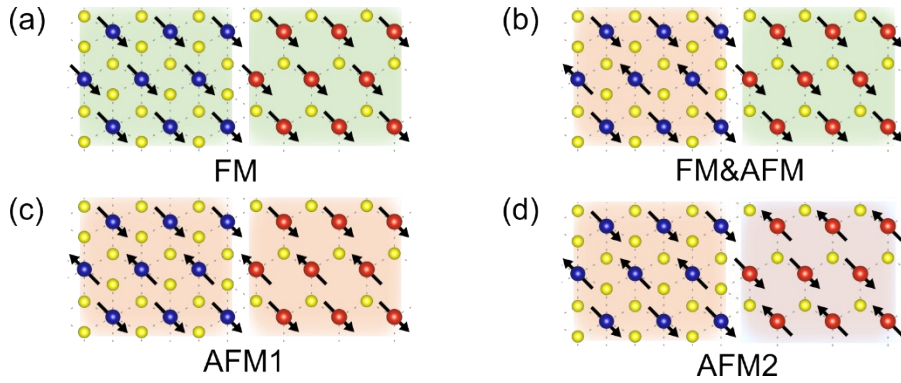

**Figure S6.** Schematic diagrams illustrating three magnetic orders used for the calculation of exchange parameters: (a) FM, (b) FM&AFM, (c) AFM1 and (d) AFM2.

Spin-exchange coupling parameters (see Fig. 4(a)) were extracted by calculating the total energy differences of eight magnetic configurations (see Fig. S4(a)-(d)) based on the Heisenberg model. The energy contributed by magnetic interaction in these magnetic orders in a unit cell is expressed as

$$E_1 = -2 \times (m-1) \times S_{Cr}^2 \times 3J_1 - 2 \times (n-1) \times S_V^2 \times 3J_2 - 2 \times S_{Cr}S_V \times 3J_3 + H_0$$

$$E_2 = 2 \times (m-1) \times S_{Cr}^2 \times J_1 - 2 \times (n-1) \times S_V^2 \times 3J_2 + 2 \times S_{Cr}S_V \times 3J_3 + H_0$$

$$E_3 = 2 \times (m-1) \times S_{Cr}^2 \times J_1 + 2 \times (n-1) \times S_V^2 \times J_2 + 2 \times S_{Cr}S_V \times 3J_3 + H_0$$

$$E_4 = 2 \times (m-1) \times S_{Cr}^2 \times J_1 + 2 \times (n-1) \times S_V^2 \times J_2 - 2 \times S_{Cr}S_V \times 3J_3 + H_0 \text{(S1)}$$

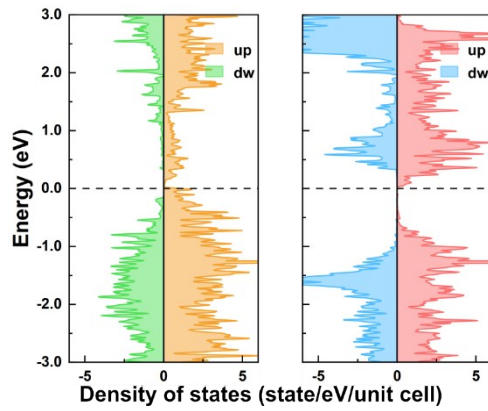

**Figure S7.** Projected density of states of the central unit cells of  $\text{CrS}_2$  and  $\text{VS}_2$  in the  $\text{CrS}_2(7)/\text{VS}_2(7)$  superlattice.

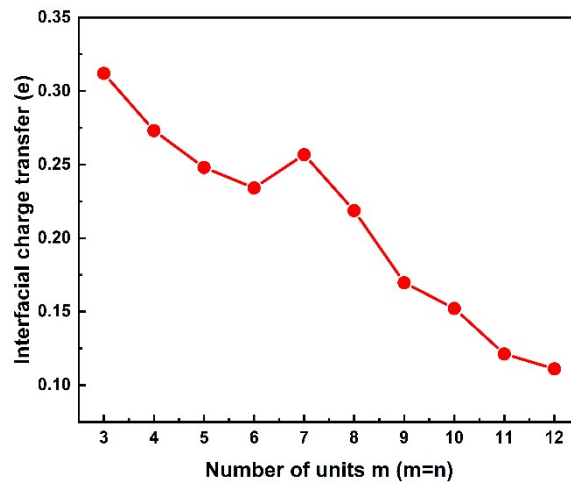

**Figure S8.** The charge transfer at the interface from the  $\text{CrS}_2$  ribbon to the  $\text{VS}_2$  ribbon as a function of the number of units for  $m=n$ .

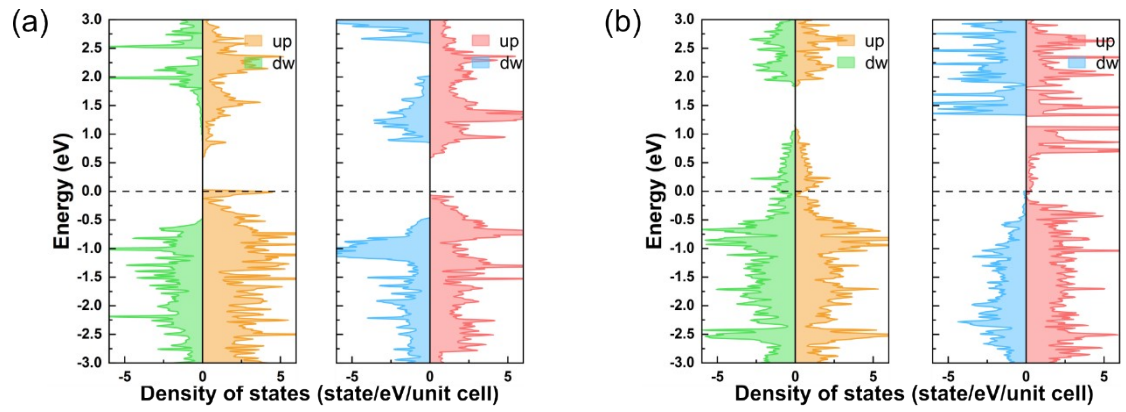

**Figure S9.** Projected density of states of the central unit cells of CrS<sub>2</sub> and VS<sub>2</sub> in the (a) CrS<sub>2</sub>(1)/VS<sub>2</sub>(13) and (b) CrS<sub>2</sub>(13)/VS<sub>2</sub>(1) superlattices.

**Table S1.** Structural parameters of the FM and sAFM states for monolayers 1T-CrS<sub>2</sub> and 2H-VS<sub>2</sub>.

|                        | $a$ (Å) | $b$ (Å) | $\theta_1$ (°) | $\theta_2$ (°) |
|------------------------|---------|---------|----------------|----------------|
| CrS <sub>2</sub> -sAFM | 3.34    | 5.51    | 88.58          | 84.85          |
| CrS <sub>2</sub> -FM   | 3.33    | 5.76    | 88.61          | 88.21          |
| VS <sub>2</sub> -sAFM  | 3.22    | 5.64    | 86.42          | 86.20          |
| VS <sub>2</sub> -FM    | 3.22    | 5.57    | 87.66          | 87.62          |
